# Supplementary material for: Ammonia sensing performance of thin films of cobalt(II) phthalocyanine bearing fluorinated substituents
Source: Springer Nature journal article supplement (doi:10.1007/s10854-019-01068-8), 2019-03-12
Supplement: MOESM1 [file 16545244]

SUPPORTING INFORMATION

**Ammonia sensing performance of thin films of cobalt(II) phthalocyanine bearing fluorinated substituents**

Esra Nur Kaya1, Ahmet Şenocak1, Darya D. Klyamer2,3, Erhan Demirbaş1,

Tamara V. Basova2,3[[1]](#footnote-1)*, Mahmut Durmuş1

*1Gebze Technical University, Department of Chemistry, Gebze, 41400 Kocaeli, Turkey*

*2Nikolaev Institute of Inorganic Chemistry SB RAS, Novosibirsk, 630090, Russia*

*3Novosibirsk State University, Pirogova Str. 2, Russia*


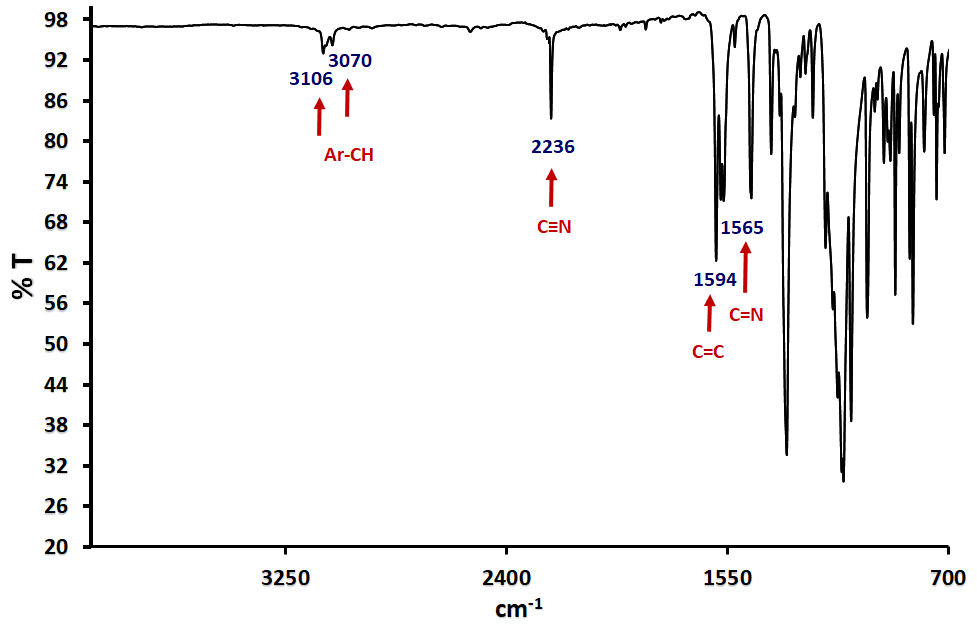


**Fig. S1.** FT-IR spectrum of the compound **1**.


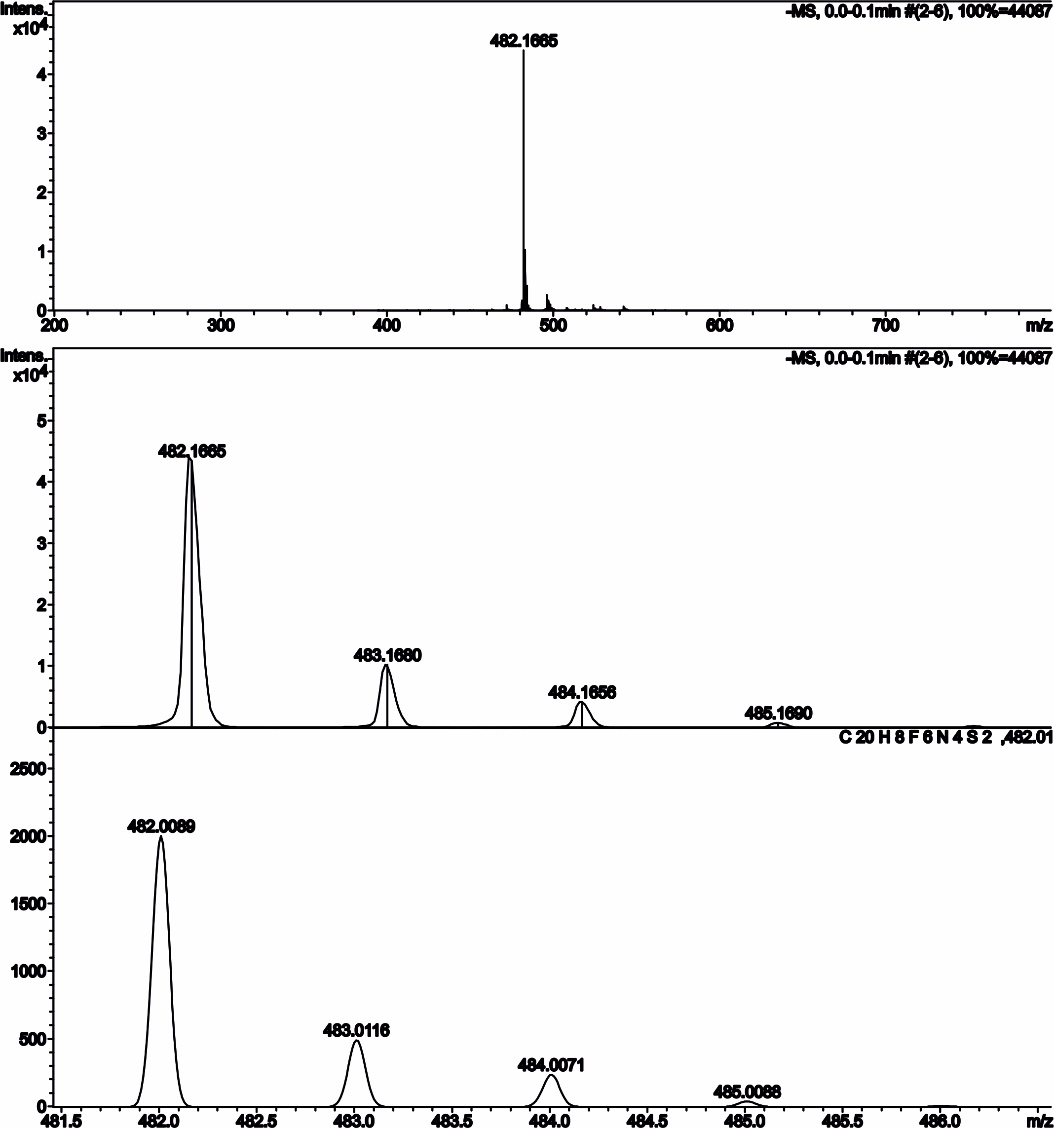


[M]+

**Fig. S2.** Mass (ESI-MS) spectrum of the compound **1**.


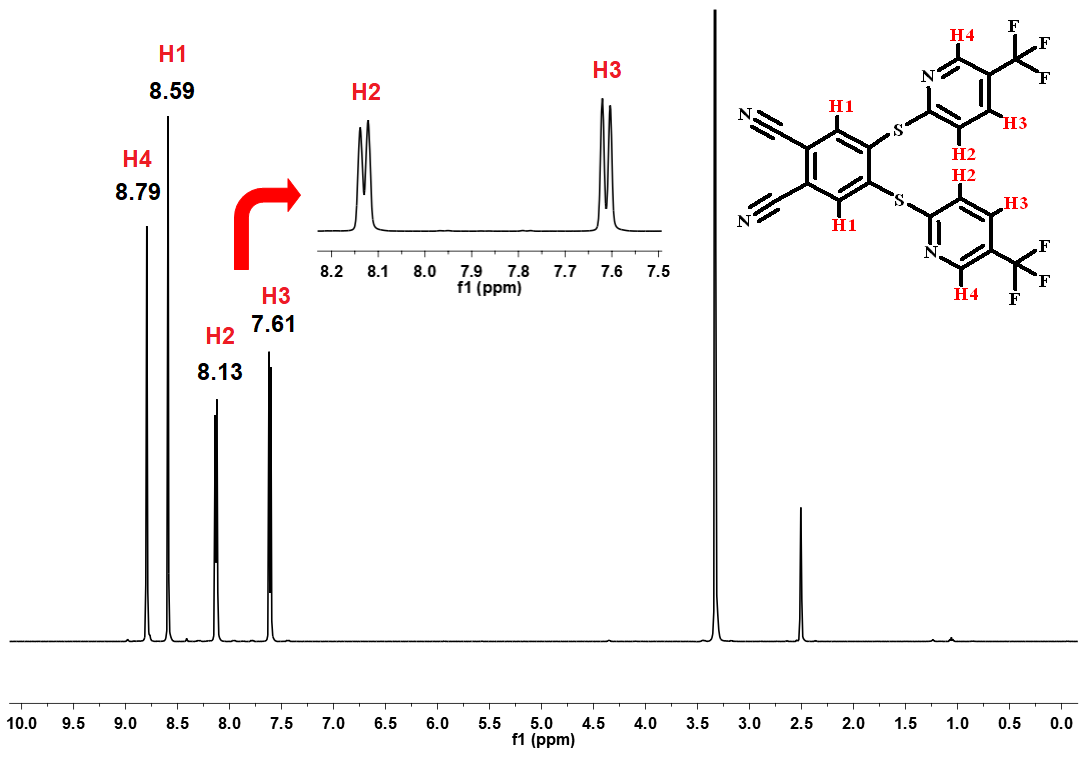


**Fig. S3.** 1H-NMR spectrum of the compound **1** in DMSO-d6.


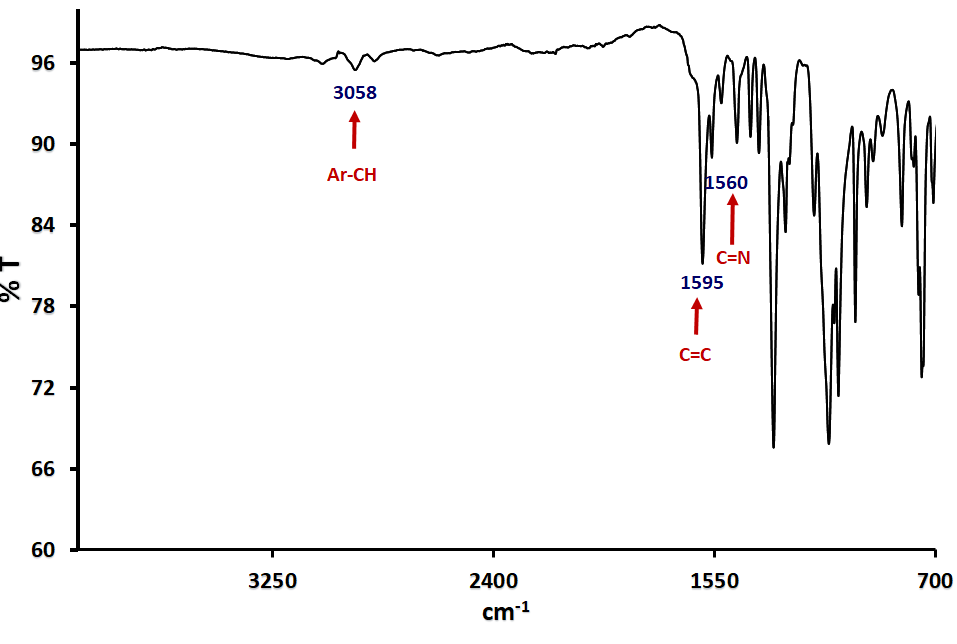


**Fig. S4.** FT-IR spectrum of the compound **2.**

**Fig. S5.** MALDI-TOFF spectrum of the compound **2.**


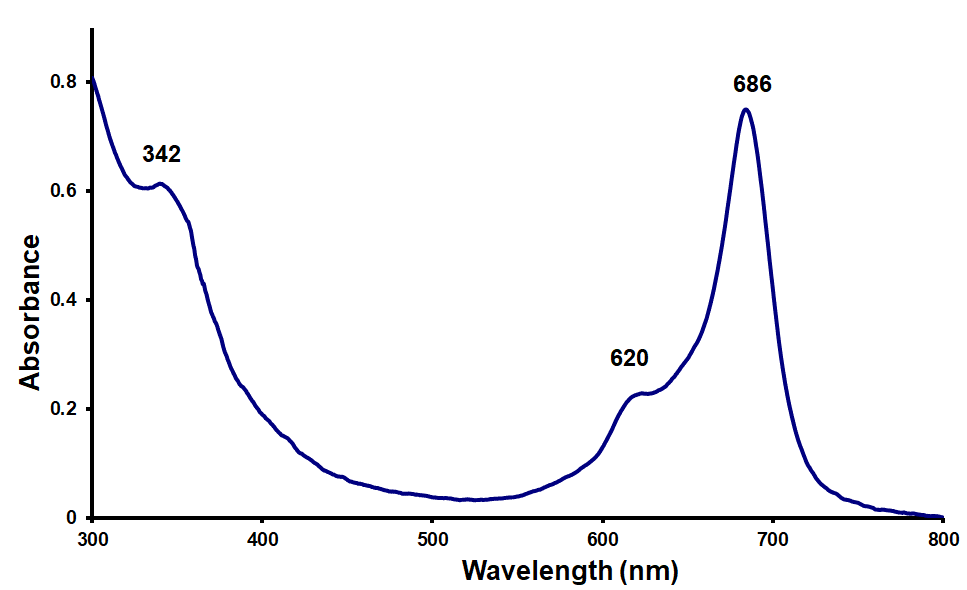


**Fig. S6.** Electronic absorption spectrum of the compound **2** in DMSO.

1. * Corresponding author: [basova@niic.nsc.ru](mailto:basova@niic.nsc.ru), tel. +7-383-3308957, fax +7-383-3309489,

   [http://orcid.org/0000-0003-4001-8371](https://www.scopus.com/redirect.uri?url=http://www.orcid.org/0000-0003-4001-8371&authorId=7003845405&origin=AuthorProfile&orcId=0000-0003-4001-8371&category=orcidLink) [↑](#footnote-ref-1)
